# Supplementary material
Source: HighWire-hosted journal article supplement (http://www.jneurosci.org/highwire/filestream/599524/field_highwire_adjunct_files/2/Legends_of_Supplemental_Figures.pdf)
Supplement: Legends_of_Supplemental_Figures.pdf [file Legends_of_Supplemental_Figures.pdf]

## Legends of Supplemental Figures

**Figure S1 Expressions of mhtt, Cdk5 and p35 transfected into COS-7 cells.** (A) Triple expressions of tNhtt-90Q-EGFP (Green), Cdk5 (Red) and myc-p35 (Blue) in the same COS-7 cells. Cdk5 and myc-p35 were immunostained with monoclonal anti-Cdk5 (DC17) and polyclonal anti-p35 (C19) antibodies followed by Alexa 647-conjugated anti-mouse and Alexa 546-conjugated anti-rabbit antibodies, respectively. Scale bar, 10  $\mu\text{m}$ . (B) Immunoblots showing the expression levels of tNhtt-166Q-EGFP, Cdk5, and p35 transfected into COS-7 cells. A bracket indicates aggregates of 166Q in the stacking gel.

**Figure S2 The effect of dynamitin on mhtt inclusion formation.** tNhtt-50Q or 90Q-EGFP was co-transfected into COS-7 cells with FLAG-dynamitin (dynamitin) or empty vector. EGFP inclusions were analyzed at 24 h after transfection. The scale bar represents 10  $\mu\text{m}$ .
